# Supplementary material for: Bronchopulmonary dysplasia: what are its links to COPD?
Source: PubMed Central journal article supplement — Ther Adv Respir Dis. 2019 Dec 10;13:1753466619892492. doi: 10.1177/1753466619892492 (PMC6904782; doi:10.1177/1753466619892492), 2019-12-10
Supplement: Reviewer_1_v.2.pdf [file Reviewer_1_v.2.pdf]

Reviewer 1 v.2

Comments to the Author

Congratulations to the authors. They did a great work addressing the comments and implementing the changes accordingly. The manuscript reads very well and offers a very thorough and good overview on the topic.

One minor editing comment: In the abstract the abbreviation of BPD is introduced, while COPD is not. The authors might want to adapt this.
